# Supplementary material for: Emerging Threat: Highly Resistant Serratia marcescens in Iraqi ICU Patients
Source: Research Square preprint supplement (doi:10.21203/rs.3.rs-4055474/v1), 2024-03-14
Supplement: Supplementary file 1 [file 57088fde2f6eabdb3dbc9dc5.xlsx]

## Sheet: Sheet1
	PHENOTYPING																			GENOTYPING
		ANTIBIOTICS																		RESISTANCE GENES
Isolates	sources	Ampicillin	Ampicillin/Sulbactam	Cefepime	Gentamicin	Tobramycin	Ciprofloxacin	Tetracycline	Amoxicillin/Clavulanic acid	Cefotaxime	Ceftriaxone	Amikacin	Imipenem	Meropenem	Levofloxacin	Tigecycline	Piperacillin/Tazobactam	azithromycin	colistin	blaCTX-M	BlaCMY	blaVIM	SHV	TEM	blaPER	IMP-1	blakpc	qnrB	qnrS	aac(6')-Ib-	ant(4’)IIb	aph(3'')Ib	rmtC	rmtD	tet(A)	Tet (X)	fosA	NDM-1	mcr-1	mphA	omp(A)	cat	Int1
Serratia marcescens	abscess
Serratia marcescens	abscess
Serratia marcescens	Blood
Serratia marcescens	Blood
Serratia marcescens	Blood
Serratia marcescens	Blood
Serratia marcescens	Blood
Serratia marcescens	Blood
Serratia marcescens	Blood
Serratia marcescens	Blood
Serratia marcescens	Blood
Serratia marcescens	Blood
Serratia marcescens	Blood
Serratia marcescens	Blood
Serratia marcescens	Blood
Serratia marcescens	Blood
Serratia marcescens	Blood
Serratia marcescens	Blood
Serratia marcescens	Blood
Serratia marcescens	Blood
Serratia marcescens	Blood
Serratia marcescens	Blood
Serratia marcescens	Blood
Serratia marcescens	Bronchial secretions
Serratia marcescens	Bronchial secretions
Serratia marcescens	Bronchial secretions
Serratia marcescens	Bronchial secretions
Serratia marcescens	Bronchial secretions
Serratia marcescens	burn
Serratia marcescens	burn
Serratia marcescens	burn
Serratia marcescens	burn
Serratia marcescens	Catheter
Serratia marcescens	Catheter
Serratia marcescens	Catheter
Serratia marcescens	Catheter
Serratia marcescens	Catheter
Serratia marcescens	Catheter
Serratia marcescens	Catheter
Serratia marcescens	Catheter
Serratia marcescens	Catheter
Serratia marcescens	Catheter
Serratia marcescens	Catheter
Serratia marcescens	Eye sample
Serratia marcescens	pleural fluids
Serratia marcescens	Urine
Serratia marcescens	Urine
Serratia marcescens	Urine
Serratia marcescens	Urine
Serratia marcescens	Urine
Serratia marcescens	Urine
Serratia marcescens	Urine
Serratia marcescens	Urine
Serratia marcescens	Urine
Serratia marcescens	Urine
Serratia marcescens	Urine
Serratia marcescens	Urine
Serratia marcescens	Urine
Serratia marcescens	Urine
Serratia marcescens	Urine
Serratia marcescens	Urine
Serratia marcescens	Urine
Serratia marcescens	Urine
Serratia marcescens	Urine
Serratia marcescens	Urine
Serratia marcescens	Urine
Serratia marcescens	Urine
Serratia marcescens	Urine
Serratia marcescens	Urine
Serratia marcescens	Urine
Serratia marcescens	Urine
Serratia marcescens	Urine
Serratia marcescens	Urine
Serratia marcescens	Urine
Serratia marcescens	Urine
Serratia marcescens	Urine
Serratia marcescens	Urine
Serratia marcescens	Urine
Serratia marcescens	Urine
Serratia marcescens	Urine
Serratia marcescens	Wound
Serratia marcescens	Wound
Serratia marcescens	Wound
Serratia marcescens	Wound
Serratia marcescens	Wound
Serratia marcescens	Wound
Serratia marcescens	Wound
Serratia marcescens	Wound
Serratia marcescens	Wound
Serratia marcescens	Wound
Serratia marcescens	Wound
Serratia marcescens	Wound
Serratia marcescens	Wound
Serratia marcescens	Wound
Serratia marcescens	Wound
Serratia marcescens	Wound
Serratia marcescens	Wound
Serratia marcescens	Wound
Serratia marcescens	Wound
Serratia marcescens	Wound
Serratia marcescens	Wound														1
																	Note: Minocycline and fosfomycin were mostly used in combination with meropenem and/or colistin
																												15
